# Supplementary material for: Myonuclear transcriptional dynamics in response to exercise following satellite cell depletion
Source: PubMed Central journal article supplement — iScience. 2021 Jul 10;24(8):102838. doi: 10.1016/j.isci.2021.102838 (PMC8326190; doi:10.1016/j.isci.2021.102838), 2021-07-10
Supplement: mmc1.pdf [file mmc1.pdf]

**iScience, Volume 24**

**Supplemental information**

**Myonuclear transcriptional dynamics**

**in response to exercise following**

**satellite cell depletion**

**Yuan Wen, Davis A. Englund, Bailey D. Peck, Kevin A. Murach, John J. McCarthy, and Charlotte A. Peterson**

## Supplemental Information

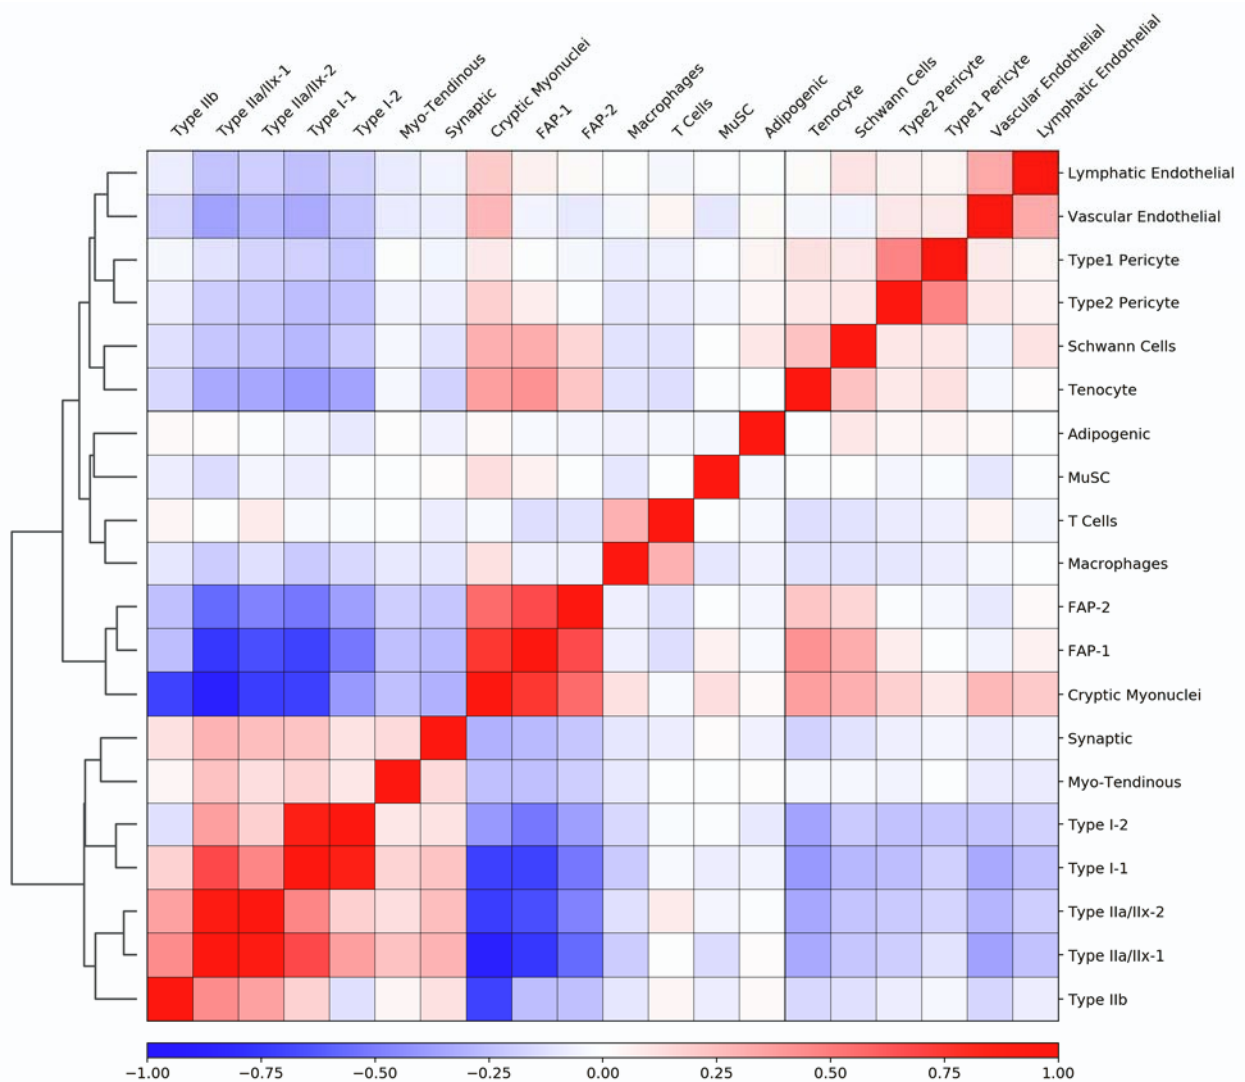

**Figure S1. Pairwise gene expression correlation analysis comparing all cluster, related to Figure 2.** Gene expression correlation demonstrates that the ambiguous nuclear cluster with MyHC gene expression is highly correlated with fibroadipogenic precursors (FAP-1 and 2). The ambiguous myonuclear cluster has moderate positive correlation with tenocytes and endothelial cells but is negatively correlated with the main Type I and II myonuclear clusters. Red and blue represent Pearson correlation coefficients of 1 and -1, respectively.

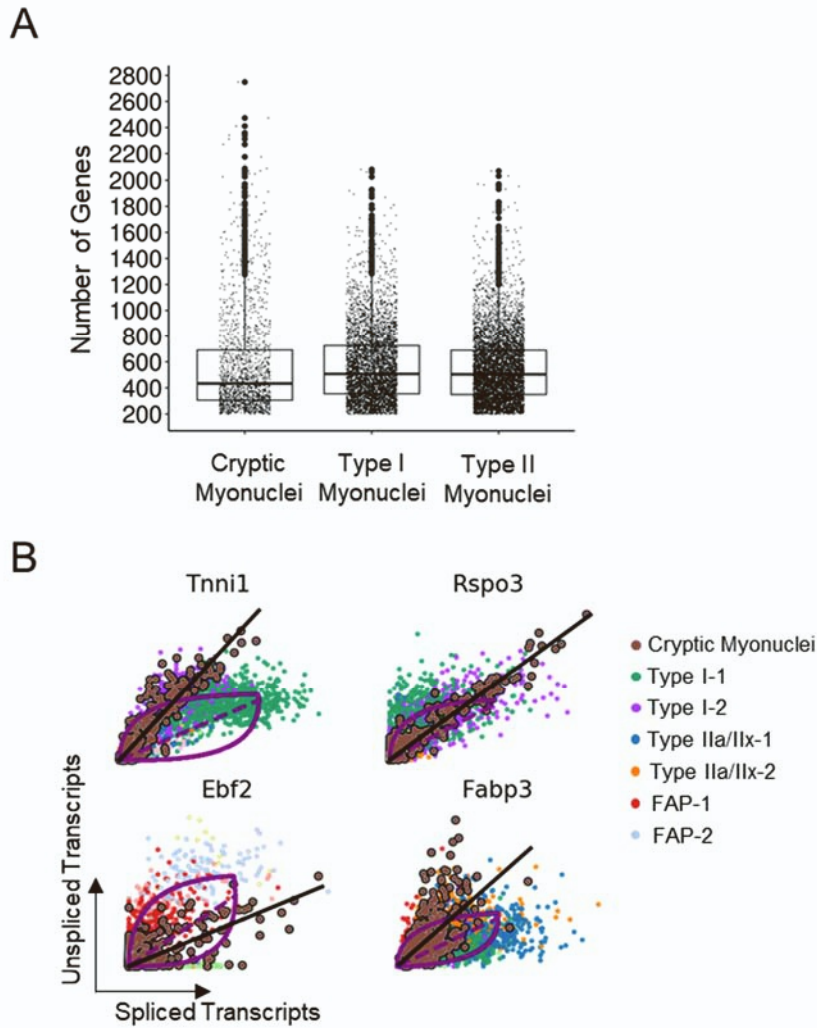

**Figure S2. Evaluation of cryptic myonuclei cluster, related to Figure 2. A)** The number of genes in the cryptic myonuclei are not higher than those in the canonical Type I and Type II myonuclei. **B)** Transcriptional dynamical modeling of RNA velocity for four genes showing differential kinetics for nuclei of different cell types. The cryptic myonuclei are distinct from other types of nuclei. Colors are coded to match the main clusters in Fig. 2A.

| Cluster    | ID         | Description                                              | GeneRatio | p.adjust | -log10(adj.p) | Count |
|------------|------------|----------------------------------------------------------|-----------|----------|---------------|-------|
| Type I     | GO:0003779 | actin binding                                            | 27/219    | 5.51E-12 | 11.26         | 27    |
|            | GO:0051015 | actin filament binding                                   | 16/219    | 2.70E-08 | 7.57          | 16    |
|            | GO:0003995 | acyl-CoA dehydrogenase activity                          | 3/219     | 1.25E-02 | 1.90          | 3     |
|            | GO:0000062 | fatty-acyl-CoA binding                                   | 4/219     | 1.25E-02 | 1.90          | 4     |
|            | GO:0050660 | flavin adenine dinucleotide binding                      | 6/219     | 1.35E-02 | 1.87          | 6     |
| Type IIa-1 | GO:0003779 | actin binding                                            | 25/293    | 2.07E-07 | 6.68          | 25    |
|            | GO:0051087 | chaperone binding                                        | 9/293     | 1.46E-03 | 2.84          | 9     |
|            | GO:0005496 | steroid binding                                          | 9/293     | 1.98E-03 | 2.70          | 9     |
|            | GO:0050662 | coenzyme binding                                         | 14/293    | 3.29E-03 | 2.48          | 14    |
|            | GO:0019829 | ATPase-coupled cation transmembrane transporter activity | 6/293     | 3.78E-03 | 2.42          | 6     |
| Type IIb-1 | GO:0004674 | protein serine/threonine kinase activity                 | 17/187    | 1.14E-04 | 3.94          | 17    |
|            | GO:0004683 | calmodulin-dependent protein kinase activity             | 5/187     | 5.60E-04 | 3.25          | 5     |
|            | GO:0005516 | calmodulin binding                                       | 10/187    | 6.22E-04 | 3.21          | 10    |
|            | GO:0008081 | phosphoric diester hydrolase activity                    | 7/187     | 7.47E-04 | 3.13          | 7     |
|            | GO:0042578 | phosphoric ester hydrolase activity                      | 13/187    | 7.47E-04 | 3.13          | 13    |

**Table S1, Gene ontology enrichment analysis of main myonuclear clusters, related to Figure 1.** Significant marker genes for each Type I, IIa, and IIb main clusters show few significantly enriched GO terms with the most significant being components of the sarcomere classified under actin binding. Other GO terms are less enriched with  $-\log_{10}(\text{adj.p}) < 4$ .
